# Supplementary material for: A facile synthesis of novel types of cyclodextrin derivatives by insertion of an aromatic dicarbonyl spacer into a permethylated α-cyclodextrin skeleton
Source: Royal Society of Chemistry journal article supplement (doi:10.1039/b204960k), 2002-06-25
Supplement: b204960k.doc [file b204960k.doc]

**Supplementary data**

A Facile Synthesis of Novel Types of Cyclodextrin Derivatives by Insertion of an Aromatic Dicarbonyl Spacer into a Permethylated -Cyclodextrin Skeleton

Toshiyuki Kida,* Takao Michinobu, Wanbin Zhang, Yohji Nakatsuji and Isao Ikeda*

*Department of Molecular Chemistry, Graduate School of Engineering, Osaka University, 2-1 Yamadaoka, Suita, Osaka 565-0871, Japan.*

*E-mail:* [kida@chem.eng.osaka-u.ac.jp](mailto:kida@chem.eng.osaka-u.ac.jp)

1H NMR spectra of compounds **4** and **5**
